# Supplementary material for: Iron-dependent modifications of the flower transcriptome, proteome, metabolome, and hormonal content in an Arabidopsis ferritin mutant
Source: PubMed Central journal article supplement — J Exp Bot. 2013 May 16;64(10):2665–88. doi: 10.1093/jxb/ert112 (PMC3697946; doi:10.1093/jxb/ert112), 2013-05-16
Supplement: supp_ert112_jexbot092783_file001.pdf [file supp_ert112_jexbot092783_file001.pdf]

**Iron-dependent modifications of the flower transcriptome, proteome, metabolome and hormonal content in an *Arabidopsis* ferritin mutant**

Damien Sudre, Elain Gutierrez-Carbonell, Giuseppe Lattanzio, Rubén Rellán-Álvarez, Frédéric Gaymard, Gert Wohlgemuth, Oliver Fiehn, Ana Álvarez-Fernández, Angel M Zamarreño, Eva Bacaicoa, Daniela Duy, Jose-María García-Mina, Javier Abadía, Katrin Philippar, Ana-Flor López-Millán and Jean-Francois Briat \*

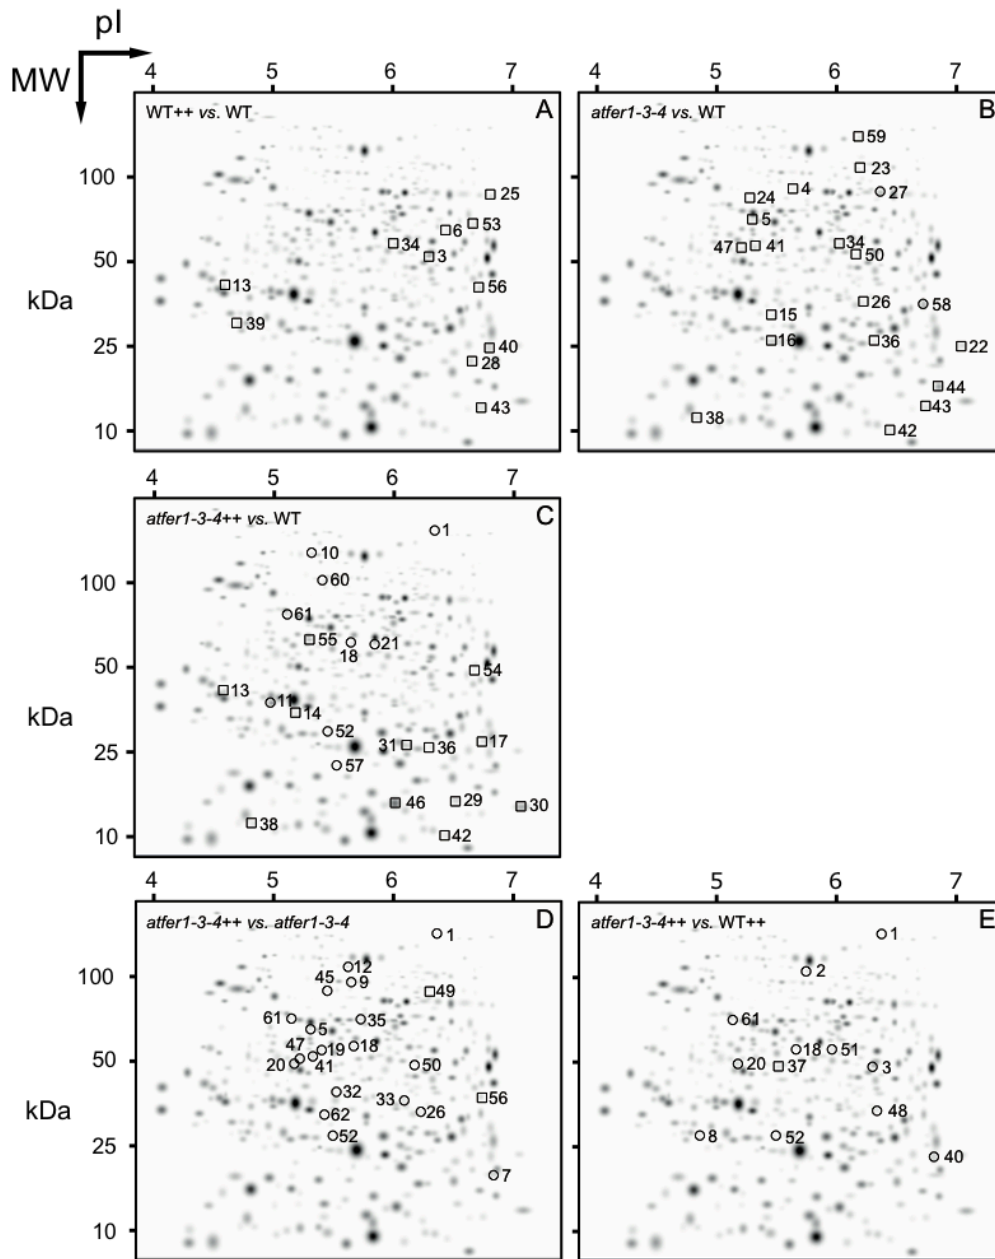

**Figure S1. Protein species identified in extracts of Arabidopsis flowers.** Proteins exhibiting significant and  $\geq 2$ -fold relative abundance changes when compared to the control and with significant homologies to proteins present in databases (using MALDI MS/MS and MASCOT, described in detail in Table P1) were annotated on virtual composite gel images. A): Changes in WT++ using WT as control. B): Changes in *atfer1-3-4* using WT as control. C): Changes in *atfer1-3-4++* using WT as control. D): Changes in *atfer1-3-4++* using *atfer1-3-4* as control.

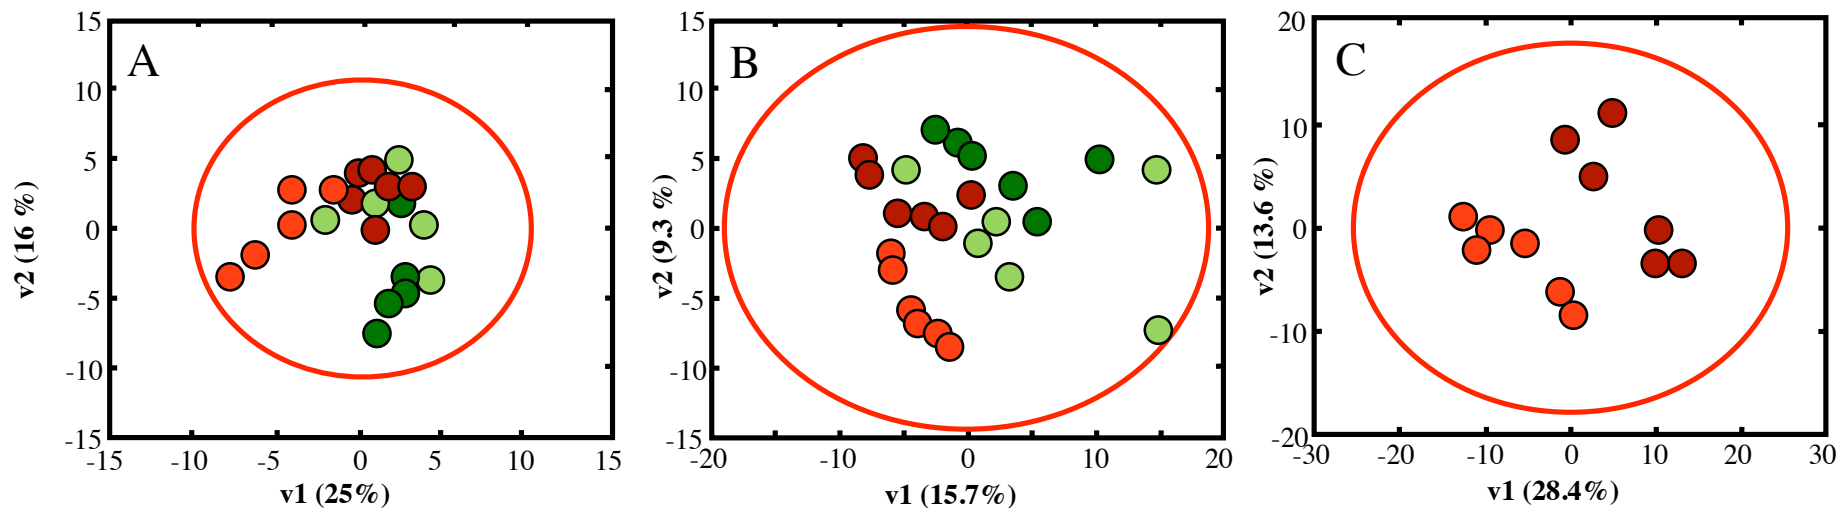

**Figure S2. Partial Least Square (PLS) analysis of *Arabidopsis* flower protein species and metabolites.** A) Score scatter plot of PLS vector 1 (v1) vs. PLS vector 2 (v2) of all identified protein species in WT (dark green circles), WT++ (light green circles), *atfer1-3-4* (dark red circles) and *atfer1-3-4++* (light red circles). B) Score scatter plot of PLS vector 1 (v1) vs. PLS vector 2 (v2) of all detected metabolites (identified ones plus unknowns) in WT (dark green circles), WT++ (light green circles), *atfer1-3-4* (dark red circles) and *atfer1-3-4++* (light red circles). C) Score scatter plot of PLS vector 1 (v1) vs. PLS vector 2 (v2) of all detected metabolites (identified ones plus unknowns) in *atfer1-3-4* (dark red circles) and *atfer1-3-4++* (light red circles). In all cases the percentage of variability explained by each vector is indicated in parenthesis in the corresponding axes.

### Table S1. Verification of DNA microarray data by quantitative RT-PCR

To verify transcriptomic data, differential expression of several genes from Tables 1, 2, and 3 was analysed by quantitative real-time RT-PCR on samples used for microarray analysis. qRT PCR was performed on n=3 replicates per treatment on *atfer1-3-4* mutants and wild type, although statistical analysis and hierarchical clustering of microarrays resulted in exclusion of one replicate each. The fold change of the transcript content for each comparison (n=2-3 ± SD) is given. For significance analysis the signals in n=3 samples were compared by a student's T-test (exception: n=2 for RPS16, CYP82C2, IAA31, in *atfer1-3-4* and for GDH3 in *atfer1-3-4++*). Green background indicates significant changes (p < 0.05) with identical regulation as determined by microarray analysis. Red background indicates non-significant differences and for IAA31 in *atfer1-3-4++* vs. WT, a regulation which is contradictory to microarrays.

| <b>Table 1</b>        |           | <i>atfer1-3-4</i><br>vs.<br>WT |        |            | <i>atfer1-3-4++</i><br>vs.<br>WT |      |            | <i>atfer1-3-4++</i><br>vs.<br>WT++ |        |            |
|-----------------------|-----------|--------------------------------|--------|------------|----------------------------------|------|------------|------------------------------------|--------|------------|
|                       |           | SD                             | T-Test | SD         | T-Test                           | SD   | T-Test     | SD                                 | T-Test |            |
| <b>RPS16</b>          | AtCg00050 | 3,5                            | 1,6    | 0,00353354 | 9,43                             | 4,1  | 0,00066089 | 6,59                               | 2,8    | 0,00085844 |
| <b>Oxidoreductase</b> | At1g26390 | 33,4                           | 19,3   | 0,0082836  | 20,74                            | 14,5 | 0,01279191 | 27,65                              | 20,8   | 0,01228497 |
| <b>CYP82C2</b>        | At4g31970 | 91,6                           | 45,5   | 0,01739976 | 83,04                            | 33,4 | 0,00319474 | 98,45                              | 49,5   | 0,0031733  |
| <b>IAA31</b>          | At3g17600 | -2,0                           | 1,4    | 0,11985135 | -1,38                            | 1,0  | 0,21272797 | -2,11                              | 0,9    | 0,0079362  |
| <b>SQE6</b>           | At5g24160 | 2,5                            | 1,7    | 0,04402486 | 4,33                             | 2,2  | 0,00232152 | 5,02                               | 2,5    | 0,00183257 |

| <b>Table 2</b>            |           | <i>atfer1-3-4++</i><br>vs.<br>WT++ |        |            |
|---------------------------|-----------|------------------------------------|--------|------------|
|                           |           | SD                                 | T-Test |            |
| <b>FRO3</b>               | At1g23020 | 1,32                               | 0,1    | 0,00237261 |
| <b>disease-resistance</b> | At2g15120 | 1,98                               | 0,8    | 0,03210152 |
| <b>ALS3</b>               | At2g37330 | 1,49                               | 0,3    | 0,00711918 |
| <b>DTX41</b>              | At3g59030 | -2,93                              | -0,9   | 0,00052471 |
| <b>CAT6</b>               | At5g04770 | 1,18                               | 0,1    | 0,00339647 |

| <b>Table 3</b> |           | <i>atfer1-3-4++</i><br>vs.<br>WT |        |            | WT++<br>vs.<br>WT |     |            |
|----------------|-----------|----------------------------------|--------|------------|-------------------|-----|------------|
|                |           | SD                               | T-Test | SD         | T-Test            |     |            |
| <b>GDH3</b>    | At3g03910 | -2,62                            | 1,1    | 0,02850871 | -2,6              | 0,9 | 0,00821683 |
| <b>ACCD</b>    | AtCg00500 | 8,13                             | 6,9    | 0,03866377 | 1,5               | 0,6 | 0,29377909 |

please note that ACCD is not regulated in WT++ vs. WT (compare Table 3)

**Method:**

Quantitative real-time RT-PCR was performed by a LightCycler instrument (Roche) as described in Duy et al., (2007). Relative signal intensity of the respective genes was normalised to signals of the housekeeping genes Actin 2, 8 and PRAT3. Oligonucleotide primers used are as follows:

| Gene                      | AGI       | Primer Name    | Sequence 5'-3'          |
|---------------------------|-----------|----------------|-------------------------|
| <b>RPS16</b>              | AtCg00050 | RPS16 LCfw     | GCAACGAGCCGTTTAT        |
|                           |           | RPS16 LCrev    | AGTCTTTCACATCCTCTTTTAT  |
| <b>Oxidoreductase</b>     | At1g26390 | Berb LCfw      | GCCACAATGAGTAGCCT       |
|                           |           | Berb LCrev     | CACATGCCACATAGC         |
| <b>CYP82C2</b>            | At4g31970 | CYP LCfw       | AACGAATTCGACCAGAG       |
|                           |           | CYP LCrev      | CACACATAAAGCCCTTCC      |
| <b>IAA31</b>              | At3g17600 | IAA LCfw       | GGCCACCGATAAAGTC        |
|                           |           | IAA LCrev      | ATGCCTAAATCTTACACGTC    |
| <b>SQE6</b>               | At5g24160 | SQE LCfw       | ACTAATTGGATCAACGGATG    |
|                           |           | SQE LCrev      | ACTGCAATACACGTTTACC     |
| <b>FRO3</b>               | At1g23020 | FRO3 LCfw      | TACGTCTACGGTCGCT        |
|                           |           | FRO3 LCrev     | ACTCACCAGTTGAACTAAT     |
| <b>disease-resistance</b> | At2g15120 | FAe LCfw       | GGACGGACGAAAGGAG        |
|                           |           | FAe LCrev      | AGCCCTTGTTAGAGCC        |
| <b>ALS3</b>               | At2g37330 | ALS3 LCfw      | GGCATTGGCACTAGGAG       |
|                           |           | ALS3 LCrev     | AGTTTCAATCTGAGGAGAAG    |
| <b>DTX41</b>              | At3g59030 | DTX41 LCfw     | TCTTCTGCGGTTTCC         |
|                           |           | DTX41 LCrev    | CTTAAACACCTGCGTTAGC     |
| <b>CAT6</b>               | At5g04770 | CAT6 fw        | AACTTGTGCCGGAAGG        |
|                           |           | CAT6 LCrev     | AAAGATCCATTGCTTCAG      |
| <b>GDH3</b>               | At3g03910 | GDH3 LCfw      | GTGCTAATCACCCAAGT       |
|                           |           | GDH3 LCrev     | CAAAGCAAATCAACAACATAGAA |
| <b>ACCD</b>               | AtCg00500 | ACCD LCfw      | GGAGCACGAATGCAAG        |
|                           |           | ACCD LCrev     | ACTCGCTCAGAACACC        |
| <b>CysP*</b>              | At1g06260 | CysP LCfw      | GAGGCGAGCCTACAAA        |
|                           |           | CysP LCrev     | AGGTTCTAACGCTTATGG      |
| <b>XTH13*</b>             | At3g25050 | XTH3 LCfw      | AAGCCTATGCAAGTCGAG      |
|                           |           | XTH3 LCrev     | GTTTGGTACTTAGAGCGATCA   |
| <b>Actin 2</b>            | At3g18780 | Actin2/8 LCfw  | GGTGATGGTGTGTCT         |
|                           |           | Actin2/8 LCrev | ACTGAGCACAATGTTAC       |
| <b>PRAT3</b>              | At2g42210 | PRAT3 LCfw     | TGCTGGGACTATTTACGG      |
|                           |           | PRAT3 LCrev    | TCTCGACGGTGAAGG         |

Table S2. Overview of the metabolite reporting list.

GC-TOF-MS metabolites

Experiment title: Iron-dependent modifications of the flower transcriptome, proteome, metabolome and hormonal content in an Arabidopsis ferritin mutant  
 Organism/Plant species: *Arabidopsis thaliana*  
 Organ/tissue: flowers  
 Analytical tool: GC-TOF-MS

| metabolite name                 | Structure | Mol Weight | Formula   | CID      | PubChem Link                  | PUBCHEM IUPAC CAS NAME                                                                                                                             | PUBCHEM_NIST_INCHIKEY        |
|---------------------------------|-----------|------------|-----------|----------|-------------------------------|----------------------------------------------------------------------------------------------------------------------------------------------------|------------------------------|
| urea                            |           | 60.06      | CH4N2O    | 1176     | <a href="#">CID: 1176</a>     | urea                                                                                                                                               | XSQUKJUFZCRTK-UHFFFAOYSA-N   |
| suberyl glycine                 |           | 229.2298   | C10H15NO5 | 16069996 | <a href="#">CID: 16069996</a> | 8-[(carboxymethyl)amino]-8-oxooctanoic acid                                                                                                        | HXATVKDSYDWTCX-UHFFFAOYSA-L  |
| 2-hydroxyglutaric acid          |           | 148.11402  | C5H8O5    | 43       | <a href="#">CID: 43</a>       | 2-Hydroxy-Pentanedioic acid                                                                                                                        | HWXBTNAVRSUQR-UHFFFAOYSA-N   |
| proline                         |           | 115.13     | C5H9NO2   | 145742   | <a href="#">CID: 145742</a>   | (2S)-2-pyrrolidinecarboxylic acid                                                                                                                  | ONIBWKKTOPOVIA-BYPYZCNSA-N   |
| threonine acid                  |           | 136.10     | C4H8O5    | 151152   | <a href="#">CID: 151152</a>   | (2S,3R)-2,3,4-trihydroxybutanoic acid                                                                                                              | JPIJQSOTBSSVTP-GBXUSLDSA-N   |
| gluconic acid lactone           |           | 178.14     | C6H10O6   | 5027     | <a href="#">CID: 5027</a>     | 1,5-Gluconolactone                                                                                                                                 | PHOQVHOSTUBQOK-SQOUGZDYSA-N  |
| homoglutamine                   |           | 160.17108  | C6H12N2O3 | 4153392  | <a href="#">CID: 4153392</a>  | 2,6-diamino-6-oxohexanoic acid                                                                                                                     | YZJSUQOZGCHHNQ-UHFFFAOYSA-N  |
| phenylalanine                   |           | 165.18914  | C9H11NO2  | 6140     | <a href="#">CID: 6140</a>     | 3-Phenylalanine                                                                                                                                    | COLNVLHDYKWLRT-QMMMGPOBSA-N  |
| tyrosine                        |           | 181.19     | C9H11NO3  | 6057     | <a href="#">CID: 6057</a>     | (2S)-2-amino-3-(4-hydroxyphenyl)propanoic acid                                                                                                     | OUYCCASOSFEME-QMMMGPOBSA-N   |
| palmitic acid                   |           | 256.42     | C16H32O2  | 985      | <a href="#">CID: 985</a>      | palmitic acid                                                                                                                                      | IPCSVZSSVZVGE-UHFFFAOYSA-N   |
| methyl heptadecanoic acid       |           | 270.45     | C17H34O2  | 10465    | <a href="#">CID: 10465</a>    | heptadecanoic acid                                                                                                                                 | KEMQGTTRYUADPNZ-UHFFFAOYSA-N |
| 3,6-anhydrogalactose            |           | 162.1406   | C6H10O5   | 16069996 | <a href="#">CID: 16069996</a> | 3,6-Anhydro-D-galactose                                                                                                                            | WZYRMLAWNVOIEX-BGPJRIDNSA-N  |
| heptadecanoic acid methyl ester |           | 284.48     | C18H36O2  | 15609    | <a href="#">CID: 15609</a>    | heptadecanoic acid methyl ester                                                                                                                    | HUEBIMLTDXXKIPR-UHFFFAOYSA-N |
| stearic acid                    |           | 284.48     | C18H36O2  | 5281     | <a href="#">CID: 5281</a>     | stearic acid                                                                                                                                       | QIOXTHOIDDYFRH-UHFFFAOYSA-N  |
| levoglucosan                    |           | 162.14     | C6H10O5   | 79029    | <a href="#">CID: 79029</a>    | 6,8-dioxabicyclo[3.2.1]octane-2,3,4-triol                                                                                                          | TWNIBLMSKIRAT-UHFFFAOYSA-N   |
| glycerol                        |           | 92.09      | C3H8O3    | 753      | <a href="#">CID: 753</a>      | glycerol                                                                                                                                           | PEDCOBHMVGVHV-UHFFFAOYSA-N   |
| glucose                         |           | 180.15588  | C6H12O6   | 79025    | <a href="#">CID: 79025</a>    | alpha-D-glucose                                                                                                                                    | WOZGKKKJUFFOK-DVKNGEFBSA-N   |
| N-acetyl-D-hexosamine           |           | 221.2078   | C8H15NO6  | 439916   | <a href="#">CID: 439916</a>   | N-[(6R)-2,4,5-trihydroxy-6-(hydroxymethyl)oxan-3-yl]acetamide                                                                                      | OVRNDRQMDRJTHS-BKJPEWSUSA-N  |
| pelargonic acid                 |           | 158.24     | C9H18O2   | 8158     | <a href="#">CID: 8158</a>     | nonanoic acid                                                                                                                                      | FBUKWVPYBMRYJY-UHFFFAOYSA-N  |
| maltose                         |           | 342.30     | C12H22O11 | 6255     | <a href="#">CID: 6255</a>     | (2R,3S,4S,5R,6R)-2-((hydroxymethyl)-6-[(2R,3S,4R,5R,6R)-4,5,6-trihydroxy-2-(hydroxymethyl)-3-tetrahydropyran-3-yl]oxy)tetrahydro pyran-3,4,5-triol | GUBGYTABKSRVRQ-QUYVBERFLSA-N |
| malonic acid                    |           | 104.06     | C3H4O4    | 867      | <a href="#">CID: 867</a>      | malonic acid                                                                                                                                       | OFOBLEOULBTSOW-UHFFFAOYSA-N  |
| threose                         |           | 120.10     | C4H8O4    | 439665   | <a href="#">CID: 439665</a>   | (2S,3R)-2,3,4-trihydroxybutanal                                                                                                                    | YTBSYETUWUMLBZ-QWWZVWQMSA-N  |
| salicin                         |           | 286.27782  | C13H18O7  | 439503   | <a href="#">CID: 439503</a>   | 2-(Hydroxymethyl)phenyl beta-D-glucopyranoside                                                                                                     | NGFMICBWJZIBI-UJPOAAUSA-N    |
| ascorbic acid                   |           | 176.12     | C6H8O6    | 5785     | <a href="#">CID: 5785</a>     | (2R)-2-[(1S)-1,2-dihydroxyethyl]-4,5-dihydroxy-3-furanone                                                                                          | TYQCGQRZGCHNB-JLAZNSOCSA-N   |

**Table S3.** Optimal parameters for the detection of IAA and ABA used in the HPLC-ESI-MS/MS analysis of Arabidopsis plants.

| Compound                        | Transition    | Dwell (ms) | DP  | EP   | CEP | CE  | CXP |
|---------------------------------|---------------|------------|-----|------|-----|-----|-----|
| IAA                             | 174.0 > 130.1 | 150        | -30 | -3.0 | -12 | -14 | -4  |
| ABA                             | 263.1 > 153.1 | 150        | -25 | -3.5 | -20 | -16 | -4  |
| <sup>2</sup> H <sub>5</sub> IAA | 179.0 > 135.2 | 150        | -20 | -7.0 | -12 | -14 | -4  |
| <sup>2</sup> H <sub>6</sub> ABA | 269.1 > 159.2 | 150        | -25 | -12  | -14 | -14 | -4  |

Abbreviations: DP, declustering potential; EP, entrance energy; CEP, collision cell entrance potential; CE, collision energy; CXP, collision cell exit potential.

**Table S4.** Optimal parameters for the multiple reaction monitoring detection of CKs used in the HPLC-ESI-MS/MS analysis of Arabidopsis plants.

| Compound <sup>z</sup> | Transition |          | Dwell Time<br>(ms) | Ionization and collision parameters <sup>y</sup> |        |         |        |     |
|-----------------------|------------|----------|--------------------|--------------------------------------------------|--------|---------|--------|-----|
|                       | Q1 (uma)   | Q3 (uma) |                    | DP (V)                                           | EP (V) | CEP (V) | CE (V) | CXP |
| tZ                    | 220        | 136      | 40                 | 36                                               | 3.5    | 16      | 25     | 4   |
|                       | 220        | 119      | 40                 | 36                                               | 3.5    | 16      | 43     | 4   |
| DHZ                   | 222        | 136      | 40                 | 41                                               | 3.0    | 16      | 29     | 4   |
|                       | 222        | 148      | 40                 | 41                                               | 3.0    | 16      | 31     | 4   |
| d-tZ                  | 225        | 137      | 40                 | 31                                               | 3.5    | 16      | 27     | 4   |
|                       | 225        | 119      | 40                 | 31                                               | 3.5    | 16      | 43     | 4   |
| tZR                   | 352        | 220      | 40                 | 46                                               | 4.5    | 19      | 25     | 4   |
|                       | 352        | 136      | 40                 | 46                                               | 4.5    | 19      | 45     | 4   |
| cZR                   | 352        | 220      | 40                 | 46                                               | 4.5    | 19      | 25     | 4   |
|                       | 352        | 136      | 40                 | 46                                               | 4.5    | 19      | 45     | 4   |
| DHZR                  | 354        | 222      | 40                 | 36                                               | 4.0    | 19      | 27     | 4   |
|                       | 354        | 136      | 40                 | 36                                               | 4.0    | 19      | 49     | 4   |
| d-tZR                 | 357        | 225      | 40                 | 31                                               | 6.0    | 20      | 25     | 4   |
|                       | 357        | 137      | 40                 | 31                                               | 6.0    | 20      | 41     | 4   |
| iP                    | 204        | 136      | 40                 | 31                                               | 4.0    | 14      | 21     | 4   |
|                       | 204        | 148      | 40                 | 31                                               | 4.0    | 14      | 17     | 4   |
| d-iP                  | 210        | 137      | 40                 | 31                                               | 5.0    | 14      | 21     | 4   |
|                       | 210        | 148      | 40                 | 31                                               | 5.0    | 14      | 19     | 4   |
| iPR                   | 336        | 204      | 40                 | 36                                               | 4.0    | 19      | 23     | 4   |
|                       | 336        | 136      | 40                 | 36                                               | 4.0    | 19      | 41     | 4   |
| d-iPR                 | 342        | 210      | 40                 | 61                                               | 4.5    | 20      | 25     | 4   |
|                       | 342        | 137      | 40                 | 61                                               | 4.5    | 20      | 47     | 4   |
| BA                    | 226        | 91       | 40                 | 46                                               | 7.5    | 14      | 33     | 4   |
|                       | 226        | 65       | 40                 | 46                                               | 7.5    | 14      | 71     | 4   |
| d-BA                  | 233        | 98       | 40                 | 46                                               | 5.0    | 14      | 37     | 4   |
|                       | 233        | 70       | 40                 | 46                                               | 5.0    | 14      | 71     | 4   |
| BAR                   | 358        | 226      | 40                 | 36                                               | 6.0    | 22      | 29     | 4   |
|                       | 358        | 91       | 40                 | 36                                               | 6.0    | 22      | 53     | 4   |
| d-BAR                 | 365        | 233      | 40                 | 36                                               | 4.5    | 18      | 29     | 4   |
|                       | 365        | 98       | 40                 | 36                                               | 4.5    | 18      | 59     | 4   |
| m-T                   | 242        | 107      | 40                 | 46                                               | 4.5    | 16      | 33     | 4   |
|                       | 242        | 77       | 40                 | 46                                               | 4.5    | 16      | 63     | 4   |
| m-TR                  | 374        | 242      | 40                 | 46                                               | 4.5    | 18      | 29     | 4   |
|                       | 374        | 107      | 40                 | 46                                               | 4.5    | 18      | 51     | 4   |
| o-T                   | 242        | 136      | 40                 | 31                                               | 4.0    | 16      | 25     | 4   |
|                       | 242        | 107      | 40                 | 31                                               | 4.0    | 16      | 35     | 4   |
| <sup>13</sup> C-oT    | 247        | 141      | 40                 | 31                                               | 4.5    | 16      | 25     | 4   |
|                       | 247        | 107      | 40                 | 31                                               | 4.5    | 16      | 33     | 4   |
| o-TR                  | 374        | 136      | 40                 | 41                                               | 4.0    | 20      | 41     | 4   |
|                       | 374        | 242      | 40                 | 41                                               | 4.0    | 20      | 25     | 4   |

<sup>z</sup>Z = trans-zeatin, DHZ = dihydrozeatin, d-tZ = [<sup>2</sup>H<sup>5</sup>] trans-zeatin, tZR = trans- zeatin riboside, cZR = cis- zeatin riboside, DHZR = dihydrozeatin riboside, d-tZR = [<sup>2</sup>H<sup>5</sup>] trans-zeatin riboside, iP = N6-isopentenyladenine, d-iP = [<sup>2</sup>H<sup>6</sup>] N6-isopentenyladenine, iPR = N6-isopentenyladenosine, d-iPR = [<sup>2</sup>H<sup>6</sup>] N6-isopentenyladenosine, BA = N6-benzyladenine, d-BA = [<sup>2</sup>H<sup>7</sup>] N6-benzyladenine, BAR = N6-benzyladenosine, d-BAR = [<sup>2</sup>H<sup>7</sup>] N6-benzyladenosine, mT = meta-topolin, mTR = meta-topolin riboside, oT = ortho-topolin, <sup>13</sup>C-oT = [<sup>13</sup>C<sup>5</sup>] ortho-topolin, o-TR = ortho-topolin riboside.

<sup>y</sup> DP = declustering potential, EP = entrance energy, CEP = collision cell entrance potential, CE = collision energy, CXP = collision cell exit potential.



| Year | Month | Day | Time  | Location | Activity | Remarks |
|------|-------|-----|-------|----------|----------|---------|
| 2018 | 1     | 1   | 08:00 | ...      | ...      | ...     |
| 2018 | 1     | 2   | 08:00 | ...      | ...      | ...     |
| 2018 | 1     | 3   | 08:00 | ...      | ...      | ...     |
| 2018 | 1     | 4   | 08:00 | ...      | ...      | ...     |
| 2018 | 1     | 5   | 08:00 | ...      | ...      | ...     |
| 2018 | 1     | 6   | 08:00 | ...      | ...      | ...     |
| 2018 | 1     | 7   | 08:00 | ...      | ...      | ...     |
| 2018 | 1     | 8   | 08:00 | ...      | ...      | ...     |
| 2018 | 1     | 9   | 08:00 | ...      | ...      | ...     |
| 2018 | 1     | 10  | 08:00 | ...      | ...      | ...     |
| 2018 | 1     | 11  | 08:00 | ...      | ...      | ...     |
| 2018 | 1     | 12  | 08:00 | ...      | ...      | ...     |
| 2018 | 1     | 13  | 08:00 | ...      | ...      | ...     |
| 2018 | 1     | 14  | 08:00 | ...      | ...      | ...     |
| 2018 | 1     | 15  | 08:00 | ...      | ...      | ...     |
| 2018 | 1     | 16  | 08:00 | ...      | ...      | ...     |
| 2018 | 1     | 17  | 08:00 | ...      | ...      | ...     |
| 2018 | 1     | 18  | 08:00 | ...      | ...      | ...     |
| 2018 | 1     | 19  | 08:00 | ...      | ...      | ...     |
| 2018 | 1     | 20  | 08:00 | ...      | ...      | ...     |
| 2018 | 1     | 21  | 08:00 | ...      | ...      | ...     |
| 2018 | 1     | 22  | 08:00 | ...      | ...      | ...     |
| 2018 | 1     | 23  | 08:00 | ...      | ...      | ...     |
| 2018 | 1     | 24  | 08:00 | ...      | ...      | ...     |
| 2018 | 1     | 25  | 08:00 | ...      | ...      | ...     |
| 2018 | 1     | 26  | 08:00 | ...      | ...      | ...     |
| 2018 | 1     | 27  | 08:00 | ...      | ...      | ...     |
| 2018 | 1     | 28  | 08:00 | ...      | ...      | ...     |
| 2018 | 1     | 29  | 08:00 | ...      | ...      | ...     |
| 2018 | 1     | 30  | 08:00 | ...      | ...      | ...     |
| 2018 | 1     | 31  | 08:00 | ...      | ...      | ...     |
| 2018 | 2     | 1   | 08:00 | ...      | ...      | ...     |
| 2018 | 2     | 2   | 08:00 | ...      | ...      | ...     |
| 2018 | 2     | 3   | 08:00 | ...      | ...      | ...     |
| 2018 | 2     | 4   | 08:00 | ...      | ...      | ...     |
| 2018 | 2     | 5   | 08:00 | ...      | ...      | ...     |
| 2018 | 2     | 6   | 08:00 | ...      | ...      | ...     |
| 2018 | 2     | 7   | 08:00 | ...      | ...      | ...     |
| 2018 | 2     | 8   | 08:00 | ...      | ...      | ...     |
| 2018 | 2     | 9   | 08:00 | ...      | ...      | ...     |
| 2018 | 2     | 10  | 08:00 | ...      | ...      | ...     |
| 2018 | 2     | 11  | 08:00 | ...      | ...      | ...     |
| 2018 | 2     | 12  | 08:00 | ...      | ...      | ...     |
| 2018 | 2     | 13  | 08:00 | ...      | ...      | ...     |
| 2018 | 2     | 14  | 08:00 | ...      | ...      | ...     |
| 2018 | 2     | 15  | 08:00 | ...      | ...      | ...     |
| 2018 | 2     | 16  | 08:00 | ...      | ...      | ...     |
| 2018 | 2     | 17  | 08:00 | ...      | ...      | ...     |
| 2018 | 2     | 18  | 08:00 | ...      | ...      | ...     |
| 2018 | 2     | 19  | 08:00 | ...      | ...      | ...     |
| 2018 | 2     | 20  | 08:00 | ...      | ...      | ...     |
| 2018 | 2     | 21  | 08:00 | ...      | ...      | ...     |
| 2018 | 2     | 22  | 08:00 | ...      | ...      | ...     |
| 2018 | 2     | 23  | 08:00 | ...      | ...      | ...     |
| 2018 | 2     | 24  | 08:00 | ...      | ...      | ...     |
| 2018 | 2     | 25  | 08:00 | ...      | ...      | ...     |
| 2018 | 2     | 26  | 08:00 | ...      | ...      | ...     |
| 2018 | 2     | 27  | 08:00 | ...      | ...      | ...     |
| 2018 | 2     | 28  | 08:00 | ...      | ...      | ...     |
| 2018 | 2     | 29  | 08:00 | ...      | ...      | ...     |
| 2018 | 2     | 30  | 08:00 | ...      | ...      | ...     |
| 2018 | 2     | 31  | 08:00 | ...      | ...      | ...     |
| 2018 | 3     | 1   | 08:00 | ...      | ...      | ...     |
| 2018 | 3     | 2   | 08:00 | ...      | ...      | ...     |
| 2018 | 3     | 3   | 08:00 | ...      | ...      | ...     |
| 2018 | 3     | 4   | 08:00 | ...      | ...      | ...     |
| 2018 | 3     | 5   | 08:00 | ...      | ...      | ...     |
| 2018 | 3     | 6   | 08:00 | ...      | ...      | ...     |
| 2018 | 3     | 7   | 08:00 | ...      | ...      | ...     |
| 2018 | 3     | 8   | 08:00 | ...      | ...      | ...     |
| 2018 | 3     | 9   | 08:00 | ...      | ...      | ...     |
| 2018 | 3     | 10  | 08:00 | ...      | ...      | ...     |
| 2018 | 3     | 11  | 08:00 | ...      | ...      | ...     |
| 2018 | 3     | 12  | 08:00 | ...      | ...      | ...     |
| 2018 | 3     | 13  | 08:00 | ...      | ...      | ...     |
| 2018 | 3     | 14  | 08:00 | ...      | ...      | ...     |
| 2018 | 3     | 15  | 08:00 | ...      | ...      | ...     |
| 2018 | 3     | 16  | 08:00 | ...      | ...      | ...     |
| 2018 | 3     | 17  | 08:00 | ...      | ...      | ...     |
| 2018 | 3     | 18  | 08:00 | ...      | ...      | ...     |
| 2018 | 3     | 19  | 08:00 | ...      | ...      | ...     |
| 2018 | 3     | 20  | 08:00 | ...      | ...      | ...     |
| 2018 | 3     | 21  | 08:00 | ...      | ...      | ...     |
| 2018 | 3     | 22  | 08:00 | ...      | ...      | ...     |
| 2018 | 3     | 23  | 08:00 | ...      | ...      | ...     |
| 2018 | 3     | 24  | 08:00 | ...      | ...      | ...     |
| 2018 | 3     | 25  | 08:00 | ...      | ...      | ...     |
| 2018 | 3     | 26  | 08:00 | ...      | ...      | ...     |
| 2018 | 3     | 27  | 08:00 | ...      | ...      | ...     |
| 2018 | 3     | 28  | 08:00 | ...      | ...      | ...     |
| 2018 | 3     | 29  | 08:00 | ...      | ...      | ...     |
| 2018 | 3     | 30  | 08:00 | ...      | ...      | ...     |
| 2018 | 3     | 31  | 08:00 | ...      | ...      | ...     |
| 2018 | 4     | 1   | 08:00 | ...      | ...      | ...     |
| 2018 | 4     | 2   | 08:00 | ...      | ...      | ...     |
| 2018 | 4     | 3   | 08:00 | ...      | ...      | ...     |
| 2018 | 4     | 4   | 08:00 | ...      | ...      | ...     |
| 2018 | 4     | 5   | 08:00 | ...      | ...      | ...     |
| 2018 | 4     | 6   | 08:00 | ...      | ...      | ...     |
| 2018 | 4     | 7   | 08:00 | ...      | ...      | ...     |
| 2018 | 4     | 8   | 08:00 | ...      | ...      | ...     |
| 2018 | 4     | 9   | 08:00 | ...      | ...      | ...     |
| 2018 | 4     | 10  | 08:00 | ...      | ...      | ...     |
| 2018 | 4     | 11  | 08:00 | ...      | ...      | ...     |
| 2018 | 4     | 12  | 08:00 | ...      | ...      | ...     |
| 2018 | 4     | 13  | 08:00 | ...      | ...      | ...     |
| 2018 | 4     | 14  | 08:00 | ...      | ...      | ...     |
| 2018 | 4     | 15  | 08:00 | ...      | ...      | ...     |
| 2018 | 4     | 16  | 08:00 | ...      | ...      | ...     |
| 2018 | 4     | 17  | 08:00 | ...      | ...      | ...     |
| 2018 | 4     | 18  | 08:00 | ...      | ...      | ...     |
| 2018 | 4     | 19  | 08:00 | ...      | ...      | ...     |
| 2018 | 4     | 20  | 08:00 | ...      | ...      | ...     |
| 2018 | 4     | 21  | 08:00 | ...      | ...      | ...     |
| 2018 | 4     | 22  | 08:00 | ...      | ...      | ...     |
| 2018 | 4     | 23  | 08:00 | ...      | ...      | ...     |
| 2018 | 4     | 24  | 08:00 | ...      | ...      | ...     |
| 2018 | 4     | 25  | 08:00 | ...      | ...      | ...     |
| 2018 | 4     | 26  | 08:00 | ...      | ...      | ...     |
| 2018 | 4     | 27  | 08:00 | ...      | ...      | ...     |
| 2018 | 4     | 28  | 08:00 | ...      | ...      | ...     |
| 2018 | 4     | 29  | 08:00 | ...      | ...      | ...     |
| 2018 | 4     | 30  | 08:00 | ...      | ...      | ...     |
| 2018 | 4     | 31  | 08:00 | ...      | ...      | ...     |
| 2018 | 5     | 1   | 08:00 | ...      | ...      | ...     |
| 2018 | 5     | 2   | 08:00 | ...      | ...      | ...     |
| 2018 | 5     | 3   | 08:00 | ...      | ...      | ...     |
| 2018 | 5     | 4   | 08:00 | ...      | ...      | ...     |
| 2018 | 5     | 5   | 08:00 | ...      | ...      | ...     |
| 2018 | 5     | 6   | 08:00 | ...      | ...      | ...     |
| 2018 | 5     | 7   | 08:00 | ...      | ...      | ...     |
| 2018 | 5     | 8   | 08:00 | ...      | ...      | ...     |
| 2018 | 5     | 9   | 08:00 | ...      | ...      | ...     |
| 2018 | 5     | 10  | 08:00 | ...      | ...      | ...     |
| 2018 | 5     | 11  | 08:00 | ...      | ...      | ...     |
| 2018 | 5     | 12  | 08:00 | ...      | ...      | ...     |
| 2018 | 5     | 13  | 08:00 | ...      | ...      | ...     |
| 2018 | 5     | 14  | 08:00 | ...      | ...      | ...     |
| 2018 | 5     | 15  | 08:00 | ...      | ...      | ...     |
| 2018 | 5     | 16  | 08:00 | ...      | ...      | ...     |
| 2018 | 5     | 17  | 08:00 | ...      | ...      | ...     |
| 2018 | 5     | 18  | 08:00 | ...      | ...      | ...     |
| 2018 | 5     | 19  | 08:00 | ...      | ...      | ...     |
| 2018 | 5     | 20  | 08:00 | ...      | ...      | ...     |
| 2018 | 5     | 21  | 08:00 | ...      | ...      | ...     |
| 2018 | 5     | 22  | 08:00 | ...      | ...      | ...     |
| 2018 | 5     | 23  | 08:00 | ...      | ...      | ...     |
| 2018 | 5     | 24  | 08:00 | ...      | ...      | ...     |
| 2018 | 5     | 25  | 08:00 | ...      | ...      | ...     |
| 2018 | 5     | 26  | 08:00 | ...      | ...      | ...     |
| 2018 | 5     | 27  | 08:00 | ...      | ...      | ...     |
| 2018 | 5     | 28  | 08:00 | ...      | ...      | ...     |
| 2018 | 5     | 29  | 08:00 | ...      | ...      | ...     |
| 2018 | 5     | 30  | 08:00 | ...      | ...      | ...     |
| 2018 | 5     | 31  | 08:00 | ...      | ...      | ...     |
| 2018 | 6     | 1   | 08:00 | ...      | ...      | ...     |
| 2018 | 6     | 2   | 08:00 | ...      | ...      | ...     |
| 2018 | 6     | 3   | 08:00 | ...      | ...      | ...     |
| 2018 | 6     | 4   | 08:00 | ...      | ...      | ...     |
| 2018 | 6     | 5   | 08:00 | ...      | ...      | ...     |
| 2018 | 6     | 6   | 08:00 | ...      | ...      | ...     |
| 2018 | 6     | 7   | 08:00 | ...      | ...      | ...     |
| 2018 | 6     | 8   | 08:00 | ...      | ...      | ...     |
| 2018 | 6     | 9   | 08:00 | ...      | ...      | ...     |
| 2018 | 6     | 10  | 08:00 | ...      | ...      | ...     |
| 2018 | 6     | 11  | 08:00 | ...      | ...      | ...     |
| 2018 | 6     | 12  | 08:00 | ...      | ...      | ...     |
| 2018 | 6     | 13  | 08:00 | ...      | ...      | ...     |
| 2018 | 6     | 14  | 08:00 | ...      | ...      | ...     |
| 2018 | 6     | 15  | 08:00 | ...      | ...      | ...     |
| 2018 | 6     | 16  | 08:00 | ...      | ...      | ...     |
| 2018 | 6     | 17  | 08:00 | ...      | ...      | ...     |
| 2018 | 6     | 18  | 08:00 | ...      | ...      | ...     |
| 2018 | 6     | 19  | 08:00 | ...      | ...      | ...     |
| 2018 | 6     | 20  | 08:00 | ...      | ...      | ...     |
| 2018 | 6     | 21  | 08:00 | ...      | ...      | ...     |
| 2018 | 6     | 22  | 08:00 | ...      | ...      | ...     |
| 2018 | 6     | 23  | 08:00 | ...      | ...      | ...     |
| 2018 | 6     | 24  | 08:00 | ...      | ...      | ...     |
| 2018 | 6     | 25  | 08:00 | ...      | ...      | ...     |
| 2018 | 6     | 26  | 08:00 | ...      | ...      | ...     |
| 2018 | 6     | 27  | 08:00 | ...      | ...      | ...     |
| 2018 | 6     | 28  | 08:00 | ...      | ...      | ...     |
| 2018 | 6     | 29  | 08:00 | ...      | ...      | ...     |
| 2018 | 6     | 30  | 08:00 | ...      | ...      | ...     |
| 2018 | 6     | 31  | 08:00 | ...      | ...      | ...     |
| 2018 | 7     | 1   | 08:00 | ...      | ...      | ...     |
| 2018 | 7     | 2   | 08:00 | ...      | ...      | ...     |
| 2018 | 7     | 3   | 08:00 | ...      | ...      | ...     |
| 2018 | 7     | 4   | 08:00 | ...      | ...      | ...     |
| 2018 | 7     | 5   | 08:00 | ...      | ...      | ...     |
| 2018 | 7     | 6   | 08:00 | ...      | ...      | ...     |
| 2018 | 7     | 7   | 08:00 | ...      | ...      | ...     |
| 2018 | 7     | 8   | 08:00 | ...      | ...      | ...     |
| 2018 | 7     | 9   | 08:00 | ...      | ...      | ...     |
| 2018 | 7     | 10  | 08:00 | ...      | ...      | ...     |
| 2018 | 7     | 11  | 08:00 | ...      | ...      | ...     |
| 2018 | 7     | 12  | 08:00 | ...      | ...      | ...     |
| 2018 | 7     | 13  | 08:00 | ...      | ...      | ...     |
| 2018 | 7     | 14  | 08:00 | ...      | ...      | ...     |
| 2018 | 7     | 15  | 08:00 | ...      | ...      | ...     |
| 2018 | 7     | 16  | 08:00 | ...      | ...      | ...     |
| 2018 | 7     | 17  |       |          |          |         |

Table S6. Summary of the 2-DE protein profiling study results. Flower fresh weight (g FW), protein per sample ( $\mu\text{g}$ ), protein yield ( $\mu\text{g prot/g flower FW}$ ), average number of spots, total number of spots changing significantly in relative abundance (t-test at  $p < 0.10$ ) and above a two-fold threshold, and number of spots newly detected, showing increased and decreased relative abundance and no longer detected. Numbers in brackets indicate identified proteins

|                                                     | WT           | WT++            | <i>atfer1-3-4</i> | <i>atfer1-3-4++</i> |                       |                      |
|-----------------------------------------------------|--------------|-----------------|-------------------|---------------------|-----------------------|----------------------|
| Flowers FW (g)                                      | 1            | 1               | 1                 | 1                   |                       |                      |
| Protein per sample ( $\mu\text{g}$ )                | 165          | 215             | 218               | 243                 |                       |                      |
| Protein yield ( $\mu\text{g protein/g flower FW}$ ) | 165          | 215             | 218               | 243                 |                       |                      |
| Number of spots (mean $\pm$ SD)                     | 362 $\pm$ 35 | 328 $\pm$ 39    | 341 $\pm$ 25      | 350 $\pm$ 40        |                       |                      |
|                                                     |              | WT++            | <i>atfer1-3-4</i> | <i>atfer1-3-4++</i> | <i>atfer1-3-4 ++</i>  | <i>atfer1-3-4 ++</i> |
|                                                     |              | vs. WT          | vs. WT            | vs. WT              | vs. <i>atfer1-3-4</i> | vs. WT++             |
| <b>Spots with significant intensity changes</b>     | -            | <b>11 (11)*</b> | <b>20 (20)</b>    | <b>21 (21)</b>      | <b>22 (21)</b>        | 12 (12)              |
| Number of new spots                                 | -            | 0               | 0                 | 1 (1)               | 2 (2)                 | 1 (1)                |
| Number of spots with increased intensity            | -            | 0               | 2 (2)             | 8 (8)               | 18 (17)               | 10 (10)              |
| Number of spots with decreased intensity            | -            | 11 (11)         | 17 (17)           | 10 (10)             | 1 (1)                 | 1 (1)                |
| Number of lost spots                                | -            | 0               | 1 (1)             | 2 (2)               | 1 (1)                 | 0                    |

\*In parentheses, number of identified spots

Table S7. Complete list of identified and unknown metabolites

| Identified metabolites |                                           |        |                |              |                  |                  |
|------------------------|-------------------------------------------|--------|----------------|--------------|------------------|------------------|
| Response ratios        |                                           |        |                |              |                  |                  |
|                        |                                           | WT++   | atfer1-2-3 vs. | atfer1-2-3++ | atfer1-2-3++ vs. | atfer1-2-3++ vs. |
|                        | name                                      | vs. WT | WT             | vs. WT       | WT++             | atfer1-2-3       |
| 1                      | xylose                                    | -1,1   | 1,5            | 1,1          | 1,2              | -1,4             |
| 2                      | xylonic acid                              | -1,1   | 1,1            | 1,1          | 1,2              | -1,0             |
| 3                      | valine                                    | 1,1    | 1,1            | -1,0         | -1,1             | -1,2             |
| 4                      | urea                                      | 2,1    | 2,0            | 9,8          | 4,7              | 4,9              |
| 5                      | UDP GlcNAc                                | 1,6    | 1,3            | -1,1         | -1,7             | -1,4             |
| 6                      | tyrosine                                  | -1,2   | -1,4           | -1,5         | -1,3             | -1,1             |
| 7                      | tryptophan                                | -1,1   | 1,0            | 1,1          | 1,1              | 1,0              |
| 8                      | trans-4-hydroxyproline                    | -1,0   | 1,2            | 1,1          | 1,1              | -1,1             |
| 9                      | threose                                   | 1,4    | -1,1           | -1,4         | -2,0             | -1,3             |
| 10                     | threonine                                 | -1,1   | 1,0            | 1,4          | 1,5              | 1,4              |
| 11                     | threonic acid                             | 1,1    | 1,8            | 2,0          | 1,8              | 1,1              |
| 12                     | sulfuric acid                             | -1,3   | 1,3            | -1,5         | -1,2             | -2,0             |
| 13                     | sucrose                                   | -1,3   | 1,2            | -1,3         | 1,0              | -1,6             |
| 14                     | succinic acid                             | -1,3   | 1,2            | 1,1          | 1,4              | -1,2             |
| 15                     | suberyl glycine                           | -1,9   | -2,9           | -1,2         | 1,6              | 2,5              |
| 16                     | stearic acid                              | 2,0    | 1,0            | -1,5         | -3,0             | -1,6             |
| 17                     | shikimic acid                             | -1,3   | 1,1            | 1,0          | 1,4              | -1,0             |
| 18                     | serine                                    | -1,3   | -1,3           | 1,1          | 1,4              | 1,3              |
| 19                     | salicin                                   | -1,5   | -1,6           | -4,1         | -2,7             | -2,5             |
| 20                     | ribonic acid                              | -1,8   | -1,5           | -1,6         | 1,1              | -1,1             |
| 21                     | rhamnose                                  | -1,4   | 1,1            | -1,3         | 1,1              | -1,4             |
| 22                     | putrescine                                | -1,8   | -1,4           | -1,3         | 1,4              | 1,1              |
| 23                     | proline                                   | 1,5    | -1,6           | 1,3          | -1,1             | 2,1              |
| 24                     | phosphoric acid                           | -1,2   | 1,3            | -1,0         | 1,1              | -1,4             |
| 25                     | phenylalanine                             | -1,4   | -1,3           | 1,1          | 1,6              | 1,5              |
| 26                     | pelargonic acid                           | 2,1    | -1,0           | -1,7         | -3,7             | -1,7             |
| 27                     | palmitic acid                             | 1,5    | 1,0            | -1,5         | -2,2             | -1,5             |
| 28                     | palatinitol                               | 2,4    | 2,3            | 1,3          | -1,9             | -1,8             |
| 29                     | oxoproline                                | -1,0   | 1,3            | 1,3          | 1,3              | -1,0             |
| 30                     | oleic acid                                | 2,0    | 1,1            | -1,0         | -2,0             | -1,1             |
| 31                     | octadecanol                               | 1,9    | -1,1           | -1,5         | -2,7             | -1,4             |
| 32                     | O-acetylserine                            | -1,5   | -1,6           | -1,4         | 1,1              | 1,2              |
| 33                     | N-methylalanine                           | 1,3    | -1,2           | -1,2         | -1,6             | -1,0             |
| 34                     | N-acetyl-D-mannosamine                    | -1,8   | -1,1           | -1,4         | 1,3              | -1,3             |
| 35                     | N-acetyl-D-hexosamine                     | -1,4   | -1,0           | -1,7         | -1,2             | -1,7             |
| 36                     | myristic acid                             | 1,7    | 1,1            | -1,2         | -2,0             | -1,4             |
| 37                     | mucic acid                                | 1,1    | 1,3            | -1,0         | -1,1             | -1,3             |
| 38                     | monopalmitin-1-glyceride                  | 2,2    | 1,1            | -1,4         | -3,1             | -1,5             |
| 39                     | monomyristin                              | 2,2    | 1,1            | -1,5         | -3,2             | -1,6             |
| 40                     | methylhexadecanoic acid                   | 1,9    | 1,0            | -1,4         | -2,7             | -1,5             |
| 41                     | maltose                                   | -1,5   | -1,2           | -2,1         | -1,4             | -1,8             |
| 42                     | malonic acid                              | -1,5   | 1,4            | -1,3         | 1,2              | -1,8             |
| 43                     | malic acid                                | -1,1   | 1,3            | 1,1          | 1,3              | -1,1             |
| 44                     | levoglucosan                              | -1,6   | 1,2            | -1,3         | 1,2              | -1,6             |
| 45                     | levanbiose                                | 1,1    | 1,2            | 1,1          | -1,0             | -1,1             |
| 46                     | leucine                                   | 1,6    | 1,5            | 1,7          | 1,0              | 1,1              |
| 47                     | lactic acid                               | 2,2    | 1,4            | -1,6         | -3,6             | -2,2             |
| 48                     | isomaltose                                | 1,2    | 1,6            | 1,2          | -1,0             | -1,3             |
| 49                     | isoleucine                                | 1,4    | 1,1            | 1,3          | -1,0             | 1,2              |
| 50                     | Inositol-myo                              | -1,4   | -1,1           | -1,4         | -1,0             | -1,2             |
| 51                     | inositol-4-monophosphate                  | 1,2    | 1,1            | -1,1         | -1,2             | -1,1             |
| 52                     | indole-3-acetonitrile                     | -1,4   | 1,4            | 1,1          | 1,5              | -1,2             |
| 53                     | idonic acid                               | -1,0   | 1,1            | 1,1          | 1,1              | -1,0             |
| 54                     | hydroxylamine                             | 2,6    | -1,2           | -1,7         | -4,3             | -1,4             |
| 55                     | homoglutamine                             | 1,0    | 1,5            | 1,5          | 1,4              | -1,0             |
| 56                     | heptadecanoic acid monoglycerol ester     | 2,1    | 1,1            | -1,4         | -3,0             | -1,6             |
| 57                     | heptadecanoic acid monoacylglycerol ester | 1,9    | 1,1            | -1,4         | -2,7             | -1,6             |
| 58                     | glycolic acid                             | -1,1   | -1,0           | -1,5         | -1,4             | -1,5             |
| 59                     | glycine                                   | -2,0   | -2,0           | -1,9         | 1,1              | 1,0              |
| 60                     | glycerol-alpha-phosphate                  | 1,0    | 1,4            | 1,3          | 1,3              | -1,1             |
| 61                     | glycerol                                  | 2,2    | 1,1            | -1,4         | -3,1             | -1,6             |
| 62                     | glyceric acid                             | -1,4   | -1,1           | -1,4         | -1,0             | -1,3             |
| 63                     | glutamine                                 | -1,2   | 1,1            | 1,1          | 1,3              | 1,0              |

|     |                                        |      |       |      |       |      |
|-----|----------------------------------------|------|-------|------|-------|------|
| 64  | glutamic acid                          | -1,4 | -1,1  | 1,1  | 1,6   | 1,3  |
| 65  | glucose-6-phosphate                    | -1,0 | 1,1   | -1,2 | -1,2  | -1,3 |
| 66  | glucose                                | -1,4 | 1,3   | -1,2 | 1,1   | -1,6 |
| 67  | glucose-1-phosphate                    | -1,3 | 1,3   | 1,0  | 1,3   | -1,3 |
| 68  | glucose                                | 1,8  | 1,3   | -1,3 | -2,2  | -1,7 |
| 69  | gluconic acid lactone                  | 1,5  | 1,5   | 2,0  | 1,3   | 1,3  |
| 70  | gluconic acid                          | -1,1 | 1,3   | 1,2  | 1,4   | -1,1 |
| 71  | glucoheptulose                         | -1,2 | 1,1   | -1,1 | 1,1   | -1,2 |
| 72  | galactose-6-phosphate                  | -1,1 | 1,1   | -1,3 | -1,2  | -1,4 |
| 73  | galactonic acid                        | -1,3 | 1,3   | 1,0  | 1,4   | -1,2 |
| 74  | galactinol                             | -1,3 | 1,1   | -1,2 | 1,0   | -1,3 |
| 75  | fumaric acid                           | -1,4 | 1,3   | -1,0 | 1,4   | -1,3 |
| 76  | fucose 1 + rhamnose 2                  | -1,1 | 1,2   | -1,0 | 1,0   | -1,2 |
| 77  | fructose-6-phosphate                   | -1,2 | 1,1   | -1,3 | -1,0  | -1,4 |
| 78  | fructose 1                             | -1,5 | 1,3   | 1,0  | 1,6   | -1,2 |
| 79  | erythronic acid lactone                | -1,1 | -1,3  | -1,8 | -1,6  | -1,4 |
| 80  | erythritol                             | -1,1 | 1,5   | 1,3  | 1,4   | -1,2 |
| 81  | dehydroascorbate                       | -1,5 | 1,8   | 1,7  | 2,5   | -1,0 |
| 82  | citric acid                            | -1,1 | 1,0   | 1,3  | 1,4   | 1,2  |
| 83  | citramalic acid                        | 1,2  | 1,1   | 1,0  | -1,2  | -1,1 |
| 84  | cellobiotol                            | 4,7  | -12,0 | -6,7 | -31,4 | 1,8  |
| 85  | beta-alanine                           | 1,0  | -2,1  | -1,4 | -1,5  | 1,5  |
| 86  | benzoic acid                           | 2,4  | 1,0   | -1,5 | -3,6  | -1,5 |
| 87  | aspartic acid                          | -1,0 | -1,1  | 1,2  | 1,3   | 1,4  |
| 88  | asparagine                             | -1,1 | 1,2   | 1,4  | 1,5   | 1,2  |
| 89  | ascorbic acid                          | -4,8 | -3,2  | -5,0 | -1,0  | -1,6 |
| 90  | arachidic acid                         | 2,4  | 1,2   | -1,3 | -3,3  | -1,6 |
| 91  | arabinose                              | -1,0 | 1,1   | -1,0 | -1,0  | -1,2 |
| 92  | alpha ketoglutaric acid                | -1,2 | -1,1  | 1,2  | 1,5   | 1,3  |
| 93  | alanine                                | -1,5 | -1,3  | -1,2 | 1,3   | 1,0  |
| 94  | agmatine                               | 1,1  | 1,6   | -1,3 | -1,5  | -2,0 |
| 95  | aconitic acid                          | -1,2 | -1,1  | -1,3 | -1,1  | -1,2 |
| 96  | 4-hydroxyphenyl-2-ethylglucopyranoside | 1,0  | -1,3  | -1,6 | -1,7  | -1,2 |
| 97  | 3-hydroxypropionic acid                | 1,0  | 1,0   | -1,4 | -1,4  | -1,5 |
| 98  | 3,6-anhydrogalactose                   | -1,0 | -1,2  | -1,6 | -1,6  | -1,3 |
| 99  | 2-oxogluconic acid                     | 1,2  | 1,3   | 1,5  | 1,2   | 1,1  |
| 100 | 2-monopalmitin                         | 2,6  | 1,2   | -1,3 | -3,4  | -1,5 |
| 101 | 2-hydroxyglutaric acid                 | -1,1 | 2,0   | 2,5  | 2,7   | 1,3  |
| 102 | 2,3-dihydroxybutanoic acid             | 1,4  | 1,4   | 1,4  | 1,0   | 1,0  |
| 103 | 1-monostearin                          | 2,4  | -1,0  | -1,6 | -3,7  | -1,5 |

| Unknowns        |        |                |                      |                        |                          |                                |
|-----------------|--------|----------------|----------------------|------------------------|--------------------------|--------------------------------|
| Response ratios |        |                |                      |                        |                          |                                |
|                 | name   | WT++<br>vs. WT | atfer1-2-3 vs.<br>WT | atfer1-2-3++<br>vs. WT | atfer1-2-3++ vs.<br>WT++ | atfer1-2-3++ vs.<br>atfer1-2-3 |
| 1               | 447146 | 1,1            | -1,3                 | -1,8                   | -1,9                     | -1,4                           |
| 2               | 446955 | -1,1           | 1,7                  | 1,6                    | 1,8                      | -1,0                           |
| 3               | 446888 | -1,1           | 1,4                  | 1,1                    | 1,3                      | -1,3                           |
| 4               | 446884 | 1,1            | 1,3                  | 1,5                    | 1,3                      | 1,1                            |
| 5               | 446874 | 1,5            | 1,5                  | 1,7                    | 1,1                      | 1,1                            |
| 6               | 446868 | 6,6            | 1,1                  | 6,5                    | -1,0                     | 6,0                            |
| 7               | 446863 | 1,1            | 1,5                  | 1,5                    | 1,3                      | -1,0                           |
| 8               | 446861 | 8,2            | -1,0                 | 10,9                   | 1,3                      | 11,1                           |
| 9               | 446856 | -1,4           | 1,3                  | 1,4                    | 1,9                      | 1,0                            |
| 10              | 446849 | 1,3            | 1,5                  | 1,7                    | 1,4                      | 1,2                            |
| 11              | 446842 | -1,1           | 1,3                  | -1,1                   | 1,0                      | -1,5                           |
| 12              | 446831 | 12,5           | 1,1                  | 20,6                   | 1,6                      | 19,5                           |
| 13              | 446801 | 1,5            | 1,3                  | 1,4                    | -1,0                     | 1,1                            |
| 14              | 446789 | 1,0            | -1,0                 | -1,4                   | -1,5                     | -1,4                           |
| 15              | 446787 | -1,0           | 1,3                  | 1,2                    | 1,3                      | -1,1                           |
| 16              | 446777 | -1,9           | -1,0                 | -1,0                   | 1,8                      | 1,0                            |
| 17              | 446762 | 1,3            | 1,6                  | 1,3                    | 1,0                      | -1,2                           |
| 18              | 446758 | 2,3            | 1,1                  | -1,3                   | -3,1                     | -1,5                           |
| 19              | 446633 | 1,4            | -1,2                 | -2,1                   | -2,9                     | -1,8                           |
| 20              | 446067 | 1,5            | -1,2                 | -2,1                   | -3,1                     | -1,8                           |
| 21              | 445546 | 2,3            | -1,6                 | 1,2                    | -1,9                     | 1,9                            |
| 22              | 445039 | 2,8            | -1,1                 | -1,5                   | -4,3                     | -1,5                           |
| 23              | 443451 | 2,4            | 1,5                  | 2,5                    | 1,0                      | 1,7                            |

|    |        |      |      |      |      |      |
|----|--------|------|------|------|------|------|
| 24 | 438061 | 3,2  | 1,1  | -1,4 | -4,5 | -1,6 |
| 25 | 438058 | -1,0 | 1,3  | 1,2  | 1,2  | -1,2 |
| 26 | 427262 | 2,5  | 1,1  | -1,4 | -3,7 | -1,6 |
| 27 | 424915 | 1,3  | 1,7  | 1,5  | 1,2  | -1,1 |
| 28 | 424906 | -1,0 | 1,8  | 1,3  | 1,4  | -1,3 |
| 29 | 419631 | 1,5  | -1,2 | -2,1 | -3,3 | -1,8 |
| 30 | 408731 | 2,0  | 1,1  | -1,3 | -2,5 | -1,4 |
| 31 | 408490 | 2,2  | 1,0  | -1,4 | -3,2 | -1,5 |
| 32 | 407649 | 1,3  | -1,1 | 1,7  | 1,3  | 1,9  |
| 33 | 404754 | 3,5  | 1,2  | -1,2 | -4,0 | -1,4 |
| 34 | 404568 | 1,3  | 1,3  | 1,6  | 1,3  | 1,2  |
| 35 | 404516 | 1,2  | 1,4  | 1,1  | -1,0 | -1,2 |
| 36 | 382318 | 2,8  | -1,1 | -1,6 | -4,5 | -1,6 |
| 37 | 374901 | 1,1  | 1,6  | 1,3  | 1,1  | -1,3 |
| 38 | 374786 | -1,4 | -1,3 | -1,4 | -1,0 | -1,1 |
| 39 | 367932 | 2,3  | 1,1  | -1,4 | -3,1 | -1,5 |
| 40 | 352980 | -1,2 | 1,2  | 1,1  | 1,3  | -1,2 |
| 41 | 352777 | -1,5 | -1,0 | -1,3 | 1,2  | -1,3 |
| 42 | 338572 | 1,1  | -1,0 | -1,0 | -1,1 | 1,0  |
| 43 | 318412 | 1,6  | 1,4  | -1,8 | -2,8 | -2,5 |
| 44 | 317187 | -1,2 | 1,1  | -1,3 | -1,0 | -1,4 |
| 45 | 314770 | -1,6 | -1,2 | -1,8 | -1,1 | -1,5 |
| 46 | 312308 | 2,1  | 1,1  | -1,4 | -3,0 | -1,5 |
| 47 | 310785 | -1,3 | -1,6 | -2,0 | -1,6 | -1,3 |
| 48 | 310413 | 1,3  | 3,5  | 2,9  | 2,3  | -1,2 |
| 49 | 310380 | -1,0 | -1,3 | -1,9 | -1,9 | -1,5 |
| 50 | 310006 | 1,2  | 1,5  | 1,7  | 1,4  | 1,1  |
| 51 | 305055 | 2,1  | -1,5 | -2,6 | -5,6 | -1,8 |
| 52 | 303870 | 2,1  | 1,1  | 1,1  | -1,9 | -1,0 |
| 53 | 301584 | 2,8  | 1,1  | -2,8 | -8,0 | -3,3 |
| 54 | 299509 | -1,1 | 1,1  | -1,1 | -1,0 | -1,2 |
| 55 | 299396 | 1,0  | -1,1 | -1,5 | -1,6 | -1,4 |
| 56 | 293849 | 2,6  | 1,1  | -1,4 | -3,5 | -1,5 |
| 57 | 293672 | 1,1  | 1,5  | -1,0 | -1,1 | -1,6 |
| 58 | 288810 | 2,0  | 1,2  | 1,3  | -1,6 | 1,1  |
| 59 | 285065 | 1,2  | -1,1 | -1,1 | -1,3 | -1,0 |
| 60 | 272849 | 3,5  | 1,1  | -1,3 | -4,6 | -1,5 |
| 61 | 271416 | 2,1  | 1,1  | -1,2 | -2,6 | -1,4 |
| 62 | 270066 | 2,5  | 1,1  | -1,4 | -3,7 | -1,5 |
| 63 | 269984 | 1,4  | 1,1  | -1,0 | -1,4 | -1,1 |
| 64 | 268707 | -1,1 | -1,0 | -1,3 | -1,2 | -1,2 |
| 65 | 268610 | -1,9 | -1,2 | -1,6 | 1,2  | -1,3 |
| 66 | 268509 | 1,2  | 1,4  | 1,4  | 1,1  | -1,0 |
| 67 | 268365 | -4,7 | -8,7 | -3,3 | 1,4  | 2,7  |
| 68 | 268353 | -1,0 | 1,2  | -1,3 | -1,3 | -1,6 |
| 69 | 268343 | 1,2  | -1,2 | -1,1 | -1,4 | 1,0  |
| 70 | 268305 | -1,2 | 1,3  | 1,2  | 1,5  | -1,1 |
| 71 | 242417 | 3,0  | 1,3  | -1,1 | -3,4 | -1,4 |
| 72 | 238506 | -1,1 | 1,2  | -1,1 | 1,1  | -1,3 |
| 73 | 237392 | 1,4  | 1,3  | 1,0  | -1,4 | -1,2 |
| 74 | 236890 | -1,1 | 1,1  | 1,1  | 1,2  | 1,0  |
| 75 | 235965 | 2,5  | -1,3 | -2,4 | -6,0 | -1,8 |
| 76 | 235436 | 1,6  | -1,0 | 2,3  | 1,4  | 2,4  |
| 77 | 233455 | 2,8  | 1,1  | -1,4 | -3,9 | -1,5 |
| 78 | 232188 | 2,2  | -1,0 | -1,3 | -2,9 | -1,3 |
| 79 | 231576 | -1,2 | -1,0 | -1,4 | -1,2 | -1,4 |
| 80 | 231248 | -1,2 | 1,3  | -1,2 | -1,0 | -1,6 |
| 81 | 228911 | 1,0  | 1,1  | -1,1 | -1,2 | -1,2 |
| 82 | 228249 | 1,3  | -1,1 | 1,2  | -1,0 | 1,4  |
| 83 | 228018 | -1,1 | -1,1 | 1,1  | 1,2  | 1,2  |
| 84 | 227724 | -1,5 | 1,4  | -1,2 | 1,2  | -1,8 |
| 85 | 227597 | -1,2 | 1,3  | 1,8  | 2,3  | 1,4  |
| 86 | 226064 | 1,1  | 1,6  | 1,1  | 1,1  | -1,4 |
| 87 | 225867 | 1,3  | 3,8  | 3,8  | 3,0  | 1,0  |
| 88 | 225863 | 1,0  | 1,3  | -1,0 | -1,0 | -1,4 |
| 89 | 225446 | 2,0  | 1,1  | 1,2  | -1,7 | 1,0  |
| 90 | 225384 | 2,7  | 1,3  | 1,1  | -2,4 | -1,2 |
| 91 | 224843 | -1,3 | -1,1 | -1,2 | 1,1  | -1,1 |

|     |        |      |      |      |       |      |
|-----|--------|------|------|------|-------|------|
| 92  | 224635 | -1,0 | -1,1 | 1,5  | 1,5   | 1,6  |
| 93  | 224597 | 1,6  | 1,2  | 1,6  | -1,0  | 1,4  |
| 94  | 224592 | 1,1  | 1,4  | 1,2  | 1,1   | -1,2 |
| 95  | 223871 | 1,1  | 1,3  | 1,2  | 1,1   | -1,0 |
| 96  | 223865 | -1,4 | 1,1  | -1,4 | -1,0  | -1,5 |
| 97  | 223834 | 8,5  | -1,2 | -2,2 | -18,6 | -1,8 |
| 98  | 223830 | -1,1 | -1,2 | 1,1  | 1,1   | 1,3  |
| 99  | 223629 | -1,3 | 1,1  | -1,4 | -1,1  | -1,6 |
| 100 | 223505 | 1,5  | 1,3  | -1,1 | -1,6  | -1,4 |
| 101 | 222541 | 1,0  | -1,1 | -1,1 | -1,1  | 1,0  |
| 102 | 222093 | -1,8 | -3,7 | -1,5 | 1,2   | 2,4  |
| 103 | 218759 | -1,3 | 1,3  | 1,1  | 1,4   | -1,2 |
| 104 | 218755 | 1,4  | 1,9  | 1,2  | -1,2  | -1,6 |
| 105 | 218739 | -1,0 | 1,4  | 1,3  | 1,3   | -1,1 |
| 106 | 218694 | -1,4 | 1,1  | 1,2  | 1,6   | 1,1  |
| 107 | 217849 | 1,2  | 1,9  | 1,3  | 1,2   | -1,4 |
| 108 | 217809 | -1,3 | -1,4 | -1,9 | -1,4  | -1,3 |
| 109 | 217783 | 3,8  | 1,4  | 1,2  | -3,1  | -1,2 |
| 110 | 215062 | -1,3 | 1,5  | 1,1  | 1,5   | -1,3 |
| 111 | 214680 | -1,2 | -1,3 | -1,1 | 1,2   | 1,2  |
| 112 | 214528 | -1,1 | 1,3  | -1,1 | -1,0  | -1,5 |
| 113 | 214416 | 1,0  | 1,5  | 1,1  | 1,1   | -1,4 |
| 114 | 214287 | 1,2  | 1,5  | 1,5  | 1,2   | 1,0  |
| 115 | 213288 | -1,8 | -1,3 | -1,4 | 1,3   | -1,1 |
| 116 | 213230 | -3,8 | -3,1 | -4,9 | -1,3  | -1,6 |
| 117 | 213198 | -1,6 | -1,3 | -2,5 | -1,6  | -1,9 |
| 118 | 213194 | -1,1 | -1,0 | -1,7 | -1,5  | -1,7 |
| 119 | 213193 | -1,2 | 1,3  | 1,2  | 1,5   | -1,1 |
| 120 | 213182 | -2,6 | -3,0 | -6,5 | -2,5  | -2,2 |
| 121 | 213154 | 1,2  | -1,0 | 1,1  | -1,0  | 1,1  |
| 122 | 213143 | -1,2 | 1,3  | 1,3  | 1,6   | -1,1 |
| 123 | 212279 | 2,3  | -1,1 | 1,4  | -1,6  | 1,5  |
| 124 | 212261 | -1,4 | 1,1  | -1,1 | 1,3   | -1,2 |
| 125 | 212254 | 1,3  | 1,6  | 1,4  | 1,1   | -1,1 |
| 126 | 212251 | 1,3  | -1,1 | -1,8 | -2,3  | -1,6 |
| 127 | 212235 | 1,3  | 1,5  | 1,8  | 1,4   | 1,2  |
| 128 | 212016 | 1,4  | 1,5  | 1,4  | -1,0  | -1,0 |
| 129 | 211977 | 1,0  | 1,5  | 1,4  | 1,4   | -1,0 |
| 130 | 211956 | 1,1  | 1,6  | 1,6  | 1,5   | -1,0 |
| 131 | 211949 | -1,2 | 1,3  | 1,2  | 1,5   | -1,0 |
| 132 | 211932 | 1,1  | 1,3  | 1,5  | 1,4   | 1,2  |
| 133 | 211921 | -1,2 | 1,5  | -1,0 | 1,2   | -1,6 |
| 134 | 211903 | 1,1  | 1,8  | 1,4  | 1,2   | -1,3 |
| 135 | 211896 | -1,0 | -1,1 | -1,5 | -1,5  | -1,4 |
| 136 | 208897 | -1,0 | 1,3  | 1,4  | 1,4   | 1,1  |
| 137 | 208850 | 1,6  | 1,2  | 2,0  | 1,2   | 1,6  |
| 138 | 208812 | 1,3  | 1,3  | 1,1  | -1,1  | -1,2 |
| 139 | 208687 | 1,1  | -1,2 | -1,1 | -1,2  | 1,0  |
| 140 | 208686 | -1,1 | 1,3  | 1,1  | 1,2   | -1,2 |
| 141 | 204448 | 1,4  | 1,1  | -1,4 | -2,0  | -1,6 |
| 142 | 204375 | 1,7  | 1,0  | -1,4 | -2,3  | -1,4 |
| 143 | 204344 | 2,9  | 1,1  | -1,4 | -3,9  | -1,5 |
| 144 | 202856 | -1,2 | 1,2  | 1,0  | 1,3   | -1,2 |
| 145 | 202834 | -1,0 | 1,5  | 1,0  | 1,1   | -1,5 |
| 146 | 202572 | -1,1 | -1,1 | -1,0 | 1,1   | 1,1  |
| 147 | 202178 | -1,2 | 1,2  | 1,1  | 1,3   | -1,0 |
| 148 | 201005 | -2,0 | -2,3 | -1,5 | 1,4   | 1,6  |

**Table S8: Metabolite X-weights in the Partial Least Square (PLS) analysis of *Arabidopsis* flowers shown in Figure S2B.** The X-weight values indicate the relative weight of each metabolite in the explanation of the discrimination between the four classes (WT, WT<sup>++</sup>, *atfer1-3-4* and *atfer1-3-4*<sup>++</sup>).

| Positive X-weight value |        | Negative X-weight value |         |
|-------------------------|--------|-------------------------|---------|
| 213182                  | 0.1056 | 225867                  | -0.1978 |
| cellobiotol             | 0.1042 | 310413                  | -0.1695 |
| 447146                  | 0.1019 | 2-hydroxyglutaric acid  | -0.1603 |
| threose                 | 0.0953 | erythritol              | -0.1539 |
| erythronic acid lactone | 0.0848 | 215062                  | -0.1432 |
| 217809                  | 0.0844 | threonic acid           | -0.1355 |
| 305055                  | 0.0789 | 310006                  | -0.1354 |
| 3,6-anhydrogalactose    | 0.0743 | homoglutamine           | -0.1339 |
| N-methylalanine         | 0.0655 | 211956                  | -0.1322 |
| 212251                  | 0.0654 | 446856                  | -0.1216 |
| 213230                  | 0.0650 | 218694                  | -0.1197 |
| 212279                  | 0.0650 | 446888                  | -0.1192 |
| 222093                  | 0.0610 | 212235                  | -0.1191 |
| 310380                  | 0.0608 | 446849                  | -0.1190 |
| 211896                  | 0.0606 | glucose-1-phosphate     | -0.1170 |
| 445546                  | 0.0578 | 218759                  | -0.1159 |
| 213194                  | 0.0479 | indole-3-acetonitrile   | -0.1157 |
| 285065                  | 0.0474 | urea                    | -0.1151 |
| 204375                  | 0.0441 | 446863                  | -0.1137 |
| 213198                  | 0.0437 | 208686                  | -0.1136 |
| 301584                  | 0.0418 | 211932                  | -0.1127 |
| salicin                 | 0.0406 | 218739                  | -0.1070 |
| beta-alanine            | 0.0403 | 227597                  | -0.1068 |
| 446789                  | 0.0387 | fumaric acid            | -0.1056 |
| 299396                  | 0.0384 | 211977                  | -0.1046 |

**Table S9. Metabolite X-weights in the Partial Least Square (PLS) analysis of *atfer1-3-4* flowers shown in Figure S2C.** The X-weight values indicate the relative weight of each metabolite in the explanation of the discrimination between the *atfer1-3-4* and the *atfer1-3-4++* classes.

| Positive X-weight value |        | Negative X-weight value |         |
|-------------------------|--------|-------------------------|---------|
| N-acetyl-D-hexosamine   | 0.1213 | 446831                  | -0.1333 |
| malonic acid            | 0.1136 | urea                    | -0.1253 |
| 217809                  | 0.1123 | 446861                  | -0.1206 |
| 301584                  | 0.1088 | 268365                  | -0.1120 |
| 318412                  | 0.1085 | proline                 | -0.1114 |
| 213198                  | 0.1081 | 407649                  | -0.1063 |
| rhamnose                | 0.1058 | 446868                  | -0.0977 |
| 223629                  | 0.1051 | threonine               | -0.0914 |
| 223865                  | 0.1015 | 235436                  | -0.0907 |
| 446842                  | 0.1014 | 443451                  | -0.0858 |
| maltose                 | 0.1006 | 201005                  | -0.0829 |
| 214528                  | 0.0999 | phenylalanine           | -0.0827 |
| 213182                  | 0.0987 | serine                  | -0.0814 |
| levoglucosan            | 0.0968 | glutamic acid           | -0.0793 |
| 204448                  | 0.0967 | suberyl glycine         | -0.0788 |
| 427262                  | 0.0953 | 208850                  | -0.0741 |
| 299396                  | 0.0953 | aspartic acid           | -0.0712 |
| 231248                  | 0.0950 | 228249                  | -0.0711 |
| 446633                  | 0.0949 | 212235                  | -0.0666 |
| 202834                  | 0.0927 | 222093                  | -0.0599 |
| glucose                 | 0.0917 | 2-hydroxyglutaric acid  | -0.0585 |
| 268353                  | 0.0917 | 211932                  | -0.0578 |
| methylhexadecanoic acid | 0.0903 | 446849                  | -0.0550 |
| N-acetyl-D-mannosamine  | 0.0902 | isoleucine              | -0.0545 |
| palmitic acid           | 0.0895 | 224635                  | -0.0517 |
